# Supplementary material
Source: PubMed Central journal article supplement (PMC8504939)
Supplement: sj-pdf-1-jcb-10.1177_0271678X211005875.pdf [file sj-pdf-1-jcb-10.1177_0271678X211005875.pdf]

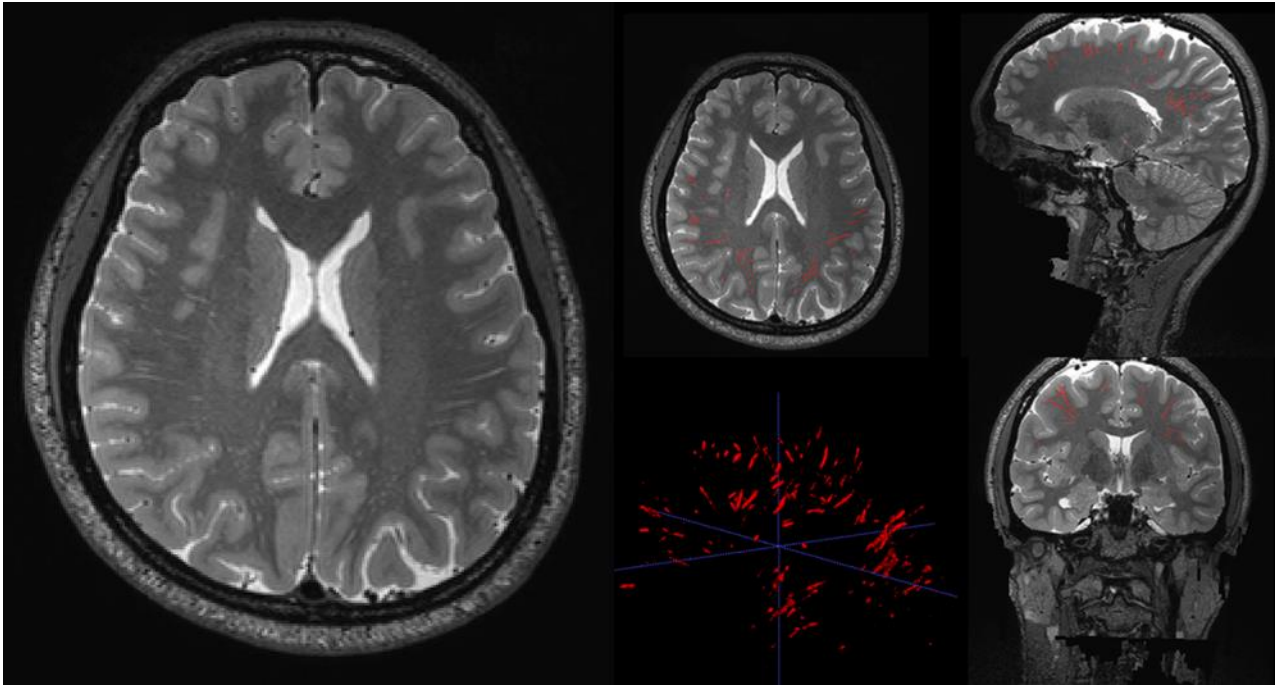

Supplementary Fig 1. Showing T2 image of a healthy adult (age 37 y-o) with extensive PVS visible. Figure on the right shows the segmented PVS mask.

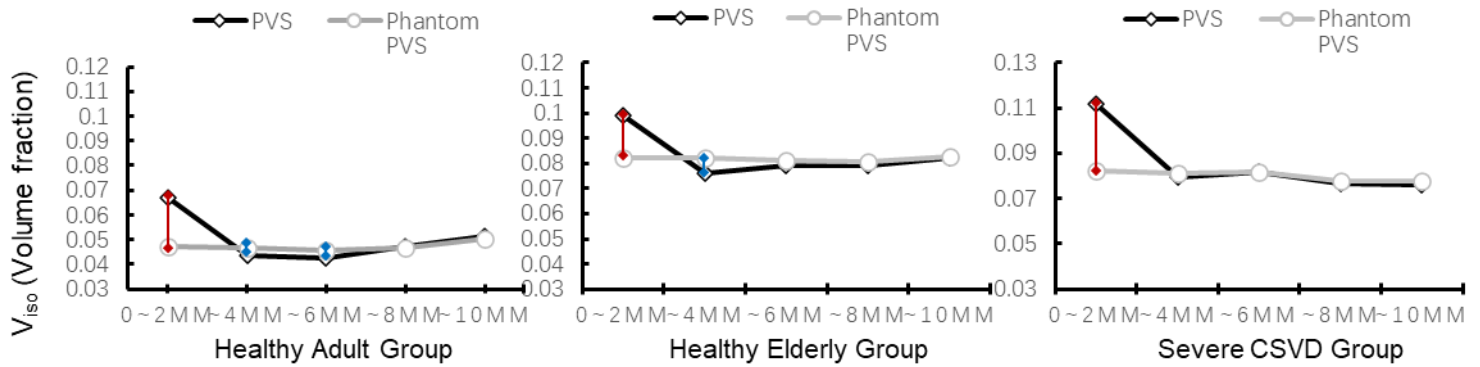

Supplementary Fig 2. Showing results for 5 layers with thickness of 2mm. For healthy elderly group, there is a significant decrease of "iso" water around 2~4mm of PVS. And in the CSVD group the decrease of "iso" water is not significant (Previously we find this decrease is significant but weaker than the other group, now it is not significant). Red lines denote Viso is significantly higher around the dPVS than around the control in that specific layer between the connected pair, and blue line vice versa.
